# Supplementary material for: Gridded 5 arcmin datasets for simultaneously farm-size-specific and crop-specific harvested areas in 56 countries
Source: Copernicus journal article supplement (doi:10.5194/essd-14-4397-2022), 2022-09-27
Supplement: Supplementary file 1 [file essd-14-4397-2022-supplement.pdf]

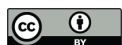

*Supplement of*

## **Gridded 5 arcmin datasets for simultaneously farm-size-specific and crop-specific harvested areas in 56 countries**

**Han Su et al.**

*Correspondence to:* Han Su ([h.su@utwente.nl](mailto:h.su@utwente.nl))

The copyright of individual parts of the supplement might differ from the article licence.

**Figure S1. Comparison between FAOSTAT structural data of 2000 (FAO, 2022) and Lowder et al. (2016) on their respective estimates of the percentage of crop area per farm size. Only the countries covered by both datasets are shown. \* Note that FAOSTAT provides obtained (part of) the structural data by interpolating other reported data, rather than taking it not directly from countries' official reports.**

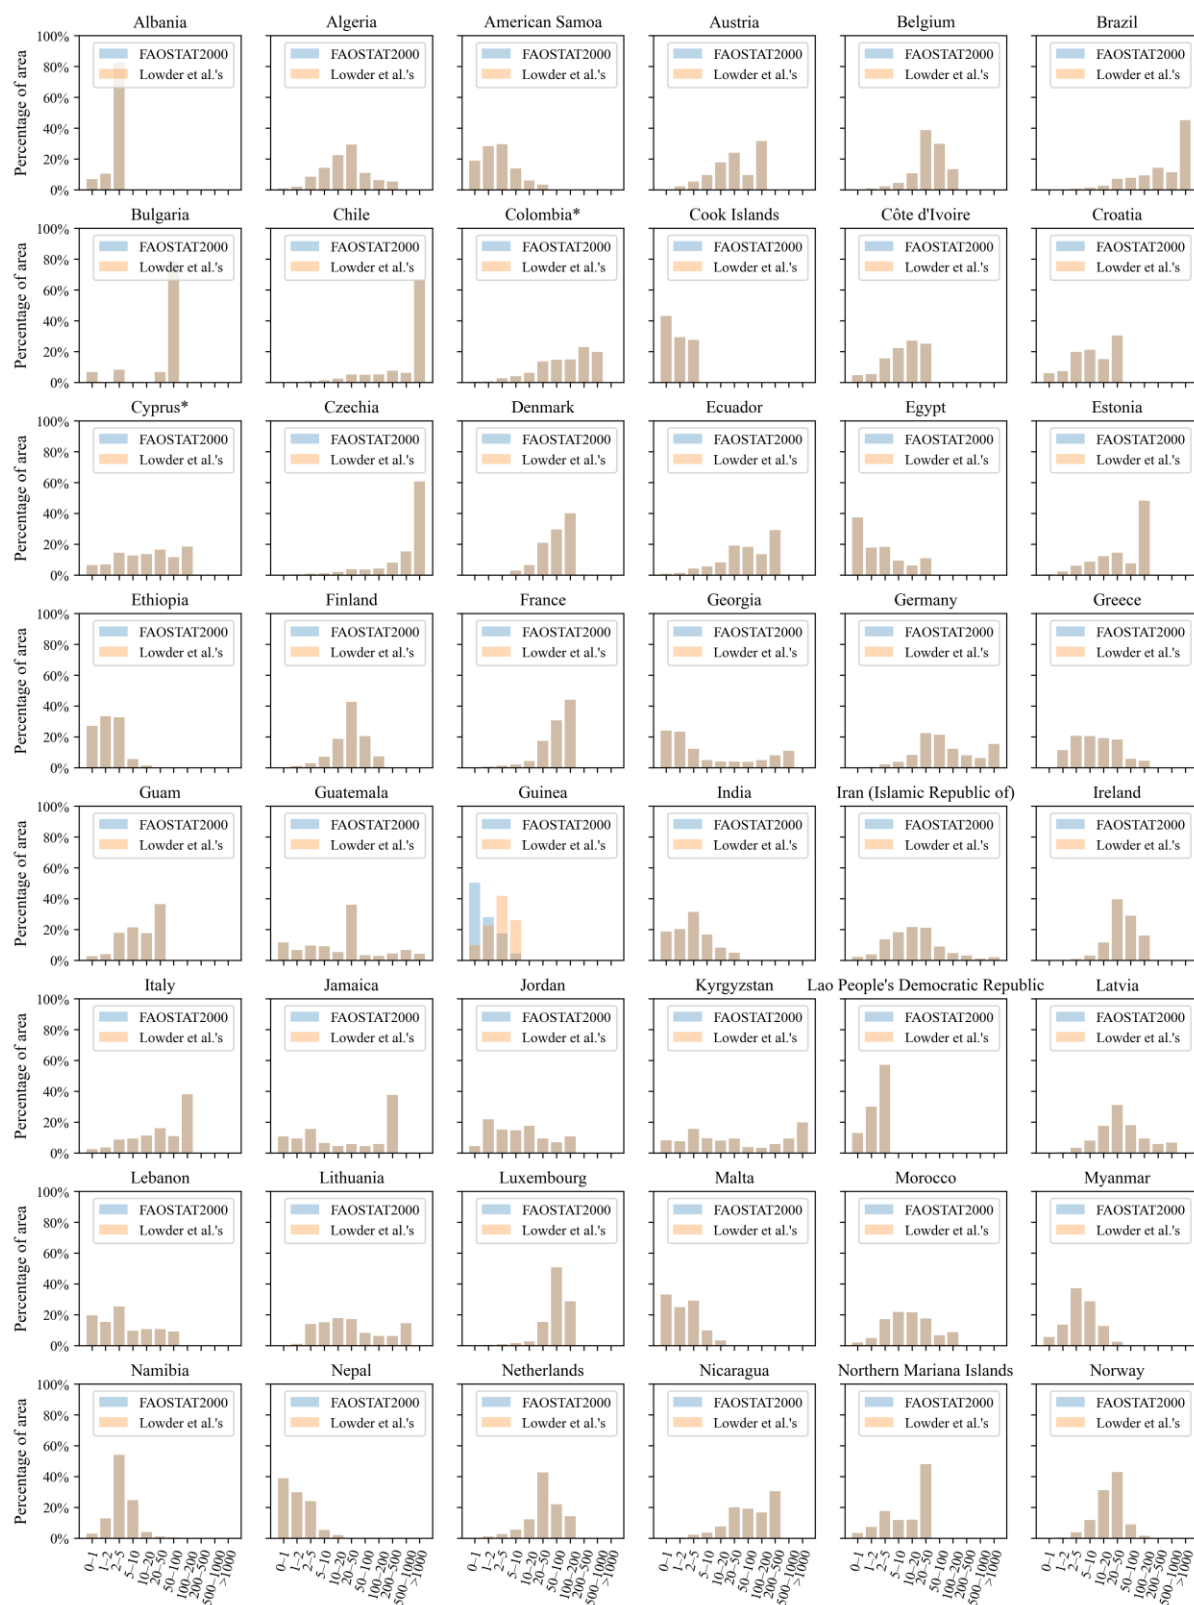

(To be continued)

(Continued)

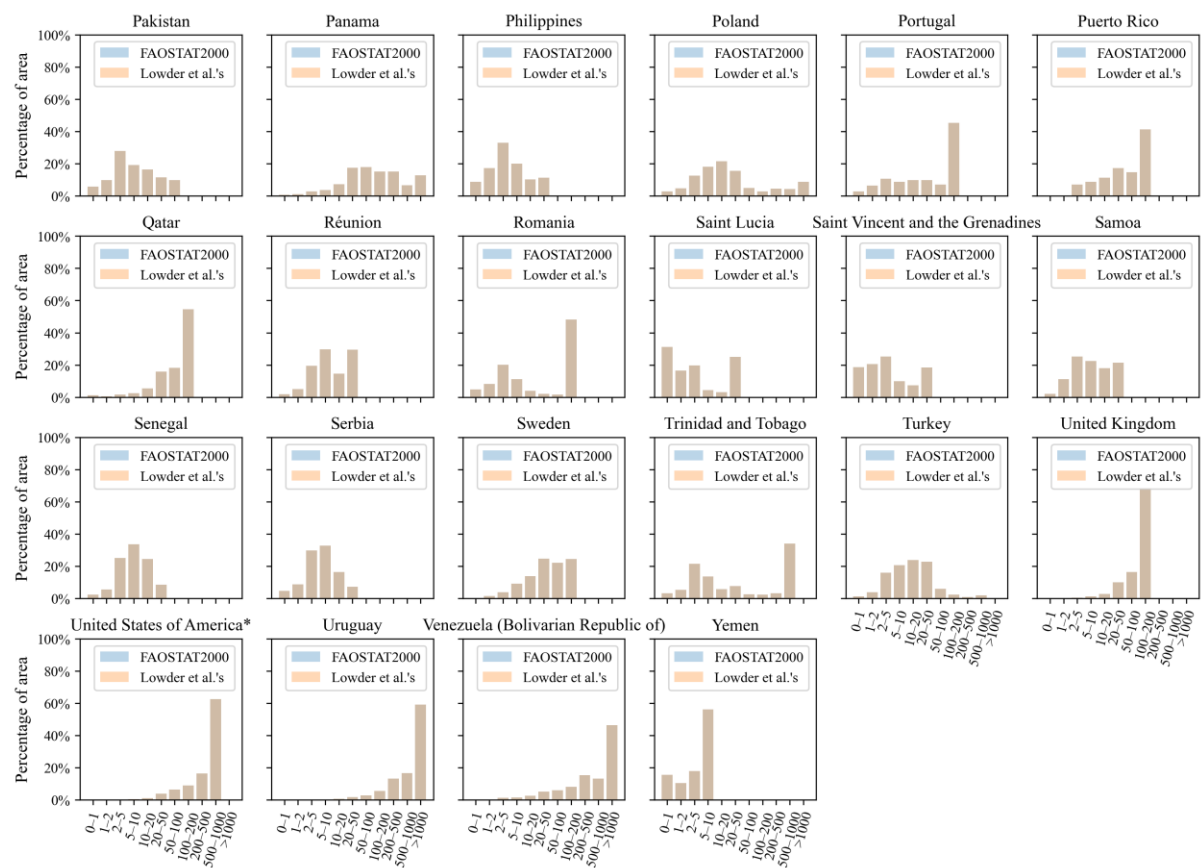

**Table S1. List of 56 countries and their country code that are included in this study.**

| No. | Country code | Country                | No. | Country code | Country                     |
|-----|--------------|------------------------|-----|--------------|-----------------------------|
| 1   | ALB          | Albania                | 29  | LUX          | Luxembourg                  |
| 2   | AUT          | Austria                | 30  | LVA          | Latvia                      |
| 3   | BEL          | Belgium                | 31  | MEX          | Mexico                      |
| 4   | BFA          | Burkina Faso           | 32  | MLI          | Mali                        |
| 5   | BGR          | Bulgaria               | 33  | MLT          | Malta                       |
| 6   | BIH          | Bosnia and Herzegovina | 34  | MNG          | Mongolia                    |
| 7   | BRA          | Brazil                 | 35  | MWI          | Malawi                      |
| 8   | COL          | Colombia               | 36  | NER          | Niger                       |
| 9   | COS          | Costa Rica             | 37  | NGA          | Nigeria                     |
| 10  | CYP          | Cyprus                 | 38  | NLD          | Netherlands                 |
| 11  | CZE          | Czechia                | 39  | NOR          | Norway                      |
| 12  | DEU          | Germany                | 40  | PAN          | Panama                      |
| 13  | DNK          | Denmark                | 41  | PER          | Peru                        |
| 14  | ESP          | Spain                  | 42  | POL          | Poland                      |
| 15  | EST          | Estonia                | 43  | PRT          | Portugal                    |
| 16  | ETH          | Ethiopia               | 44  | PRY          | Paraguay                    |
| 17  | FIN          | Finland                | 45  | ROM          | Romania                     |
| 18  | FRA          | France                 | 46  | RUS          | Russian Federation          |
| 19  | GBR          | United Kingdom         | 47  | SVK          | Slovakia                    |
| 20  | GHA          | Ghana                  | 48  | SVN          | Slovenia                    |
| 21  | GRC          | Greece                 | 49  | SWE          | Sweden                      |
| 22  | HRV          | Croatia                | 50  | TJK          | Tajikistan                  |
| 23  | HUN          | Hungary                | 51  | TLS          | Timor-Leste                 |
| 24  | IND          | India                  | 52  | TZA          | United Republic of Tanzania |
| 25  | IRL          | Ireland                | 53  | UGA          | Uganda                      |
| 26  | ITA          | Italy                  | 54  | URY          | Uruguay                     |
| 27  | KHM          | Cambodia               | 55  | USA          | United States of America    |
| 28  | LTU          | Lithuania              | 56  | ZAF          | South Africa                |

**Table S2. Classification of GAEZv4 crops and crop groups used to reclassify FAO crops, adapted based on Fischer et al. (2021). The GAEZv4 crop name and crop group were taken from Fischer et al. (2021). FAO items for each GAEZv4 crop were provided by Fischer et al. (2021) and identified by this study based on the GAEZv4 description if the respective FAO item was not mentioned by Fischer et al. (2021).**

| GAEZv4 crop             | FAO item code                                                                                                                                                                                                                             | Crop group     |
|-------------------------|-------------------------------------------------------------------------------------------------------------------------------------------------------------------------------------------------------------------------------------------|----------------|
| Banana                  | 486                                                                                                                                                                                                                                       | Fruits & nuts  |
| Barley                  | 44                                                                                                                                                                                                                                        | Cereals        |
| Cassava                 | 125                                                                                                                                                                                                                                       | Roots & tubers |
| Cotton                  | 328                                                                                                                                                                                                                                       | Cotton         |
| Fodder crops            | 639, 640, 643, 637, 638, 641, 645, 647, 651, 655                                                                                                                                                                                          | Fodder crops   |
| Fruits and nuts         | 217, 220, 222, 225, 234, 249, 490, 495, 507, 515, 521, 526, 534, 536, 558, 560, 567, 568, 571, 572, 574, 577, 587, 592, 603, 619, 491, 492, 493, 494, 497, 512, 569, 591, 600, 523, 530, 531, 541, 542, 544, 547, 549, 550, 552, 554, 489 | Fruits & nuts  |
| Groundnut               | 242                                                                                                                                                                                                                                       | Oilcrops       |
| Maize                   | 56                                                                                                                                                                                                                                        | Cereals        |
| Millet                  | 79                                                                                                                                                                                                                                        | Cereals        |
| Oil palm                | 254                                                                                                                                                                                                                                       | Oilcrops       |
| Olive                   | 260                                                                                                                                                                                                                                       | Oilcrops       |
| Other cereals           | 71, 75, 89, 108, 68, 92, 94, 97, 101, 103                                                                                                                                                                                                 | Cereals        |
| Potato and sweet potato | 116, 122                                                                                                                                                                                                                                  | Roots & tubers |
| Pulses                  | 176, 181, 187, 191, 195, 201, 211, 203, 205, 210, 197                                                                                                                                                                                     | Pulses         |
| Rapeseed                | 270, 292                                                                                                                                                                                                                                  | Oilcrops       |
| Rest of crops           | 161, 280, 289, 333, 339, 687, 689, 720, 723, 777, 782, 788, 789, 263, 265, 275, 296, 299, 336, 773, 780, 800, 809, 821, 216, 221, 223, 224, 226, 671, 677, 692, 693, 698, 702, 711, 748, 754, 836, 839, 277, 305, 310                     | Rest           |
| Sorghum                 | 83                                                                                                                                                                                                                                        | Cereals        |
| Soybean                 | 236                                                                                                                                                                                                                                       | Oilcrops       |
| Stimulants              | 656, 661, 667                                                                                                                                                                                                                             | Stimulates     |
| Sugar beet              | 157                                                                                                                                                                                                                                       | Sugar crops    |
| Sugar cane              | 156                                                                                                                                                                                                                                       | Sugar crops    |
| Sunflower               | 267                                                                                                                                                                                                                                       | Oilcrops       |
| Tobacco                 | 826                                                                                                                                                                                                                                       | Stimulates     |
| Vegetables              | 358, 372, 373, 388, 393, 394, 397, 399, 402, 406, 423, 426, 446, 449, 463, 366, 367, 401, 407, 414, 417, 420, 430, 459, 461, 1735                                                                                                         | Vegetables     |
| Wetland rice            | 27                                                                                                                                                                                                                                        | Cereals        |
| Wheat                   | 15                                                                                                                                                                                                                                        | Cereals        |
| Yams and other roots    | 135, 136, 137, 149                                                                                                                                                                                                                        | Roots & tubers |

**Table S3. Classification of SPAM2010 crops and crop groups used to reclassify FAO crops, adapted based on Yu et al. (2020). The SPAM2010 crop name and crop group were taken from Yu et al. (2020). FAO items for each SPAM2010 crop were provided by Yu et al. (2020) and identified by this study based on the SPAM2010 description if the respective FAO item was not mentioned by Yu et al. (2020).**

| SPAM2010 crop | Crop long name  | FAO item code                                                                                                                    | Crop group     |
|---------------|-----------------|----------------------------------------------------------------------------------------------------------------------------------|----------------|
| acof          | Arabica Coffee  | 656                                                                                                                              | Stimulates     |
| bana          | Banana          | 486                                                                                                                              | Fruits         |
| barl          | Barley          | 44                                                                                                                               | Cereals        |
| bean          | Bean            | 176                                                                                                                              | Pulses         |
| cass          | Cassava         | 125                                                                                                                              | Roots & tubers |
| chic          | Chickpea        | 191                                                                                                                              | Pulses         |
| cnut          | Coconut         | 249                                                                                                                              | Oilcrops       |
| coco          | Cocoa           | 661                                                                                                                              | Stimulates     |
| cott          | Cotton          | 328                                                                                                                              | Fibres         |
| cowp          | Cowpea          | 195                                                                                                                              | Pulses         |
| grou          | Groundnut       | 242                                                                                                                              | Oilcrops       |
| lent          | Lentil          | 201                                                                                                                              | Pulses         |
| maiz          | Maize           | 56                                                                                                                               | Cereals        |
| ocer          | Other Cereals   | 68, 71, 75, 89, 92, 94, 97, 101, 103, 108                                                                                        | Cereals        |
| ofib          | Other Fibre     | 773, 777, 780, 782, 788, 789, 800, 809, 821                                                                                      | Fibres         |
|               | Crops           |                                                                                                                                  |                |
| oilp          | Oilpalm         | 254                                                                                                                              | Oilcrops       |
| ooil          | Other Oil Crops | 260, 263, 265, 275, 277, 280, 296, 299, 333, 336, 339, 305, 310                                                                  | Oilcrops       |
| opul          | Other Pulses    | 181, 187, 203, 205, 210, 211                                                                                                     | Pulses         |
| orts          | Other Roots     | 135, 136, 149                                                                                                                    | Roots & tubers |
| pige          | Pigeon Pea      | 197                                                                                                                              | Pulses         |
| plnt          | Plantain        | 489                                                                                                                              | Fruits         |
| pmil          | Pearl Millet    | 79                                                                                                                               | Cereals        |
| pota          | Potato          | 116                                                                                                                              | Roots & tubers |
| rape          | Rapeseed        | 270, 292                                                                                                                         | Oilcrops       |
| rcof          | Robusta Coffee  | 656                                                                                                                              | Stimulates     |
| rest          | Rest Of Crops   | 161, 216, 217, 220, 221, 222, 223, 224, 225, 226, 234, 671, 677, 687, 689, 692, 693, 698, 702, 711, 720, 723, 748, 754, 836, 839 | Rest           |
| rice          | Rice            | 27                                                                                                                               | Cereals        |
| sesa          | Sesame Seed     | 289                                                                                                                              | Oilcrops       |
| smil          | Small Millet    | 79                                                                                                                               | Cereals        |
| sorg          | Sorghum         | 83                                                                                                                               | Cereals        |
| soyb          | Soybean         | 236                                                                                                                              | Oilcrops       |
| sugb          | Sugarbeet       | 157                                                                                                                              | Sugar crops    |

|      |                 |                                                                                                                                         |                |
|------|-----------------|-----------------------------------------------------------------------------------------------------------------------------------------|----------------|
| sugc | Sugarcane       | 156                                                                                                                                     | Sugar crops    |
| sunf | Sunflower       | 267                                                                                                                                     | Oilcrops       |
| swpo | Sweet Potato    | 122                                                                                                                                     | Roots & tubers |
| teas | Tea             | 667                                                                                                                                     | Stimulates     |
| temf | Temperate Fruit | 515, 521, 523, 526, 530, 531, 534, 536, 541, 542,<br>544, 547, 549, 550, 552, 554, 558, 560, 592, 619                                   | Fruits         |
| toba | Tobacco         | 826                                                                                                                                     | Stimulates     |
| trof | Tropical Fruit  | 490, 491, 492, 493, 494, 495, 497, 507, 512, 567,<br>568, 569, 571, 572, 574, 577, 587, 591, 600, 603                                   | Fruits         |
| vege | Vegetables      | 358, 366, 367, 372, 373, 388, 393, 394, 397, 399,<br>401, 402, 406, 407, 414, 417, 420, 423, 426, 430,<br>446, 449, 459, 461, 463, 1735 | Vegetables     |
| whea | Wheat           | 15                                                                                                                                      | Cereals        |
| yams | Yams            | 137                                                                                                                                     | Roots & tubers |

**Table S4. List of eleven household surveys that harmonized into FAO RuLIS (Rural Livelihoods Information System) database (FAO, 2021) and used to estimate the percentage of irrigated area per farm size in this study for comparison.**

| Country                     | Year | Survey                                                                     |
|-----------------------------|------|----------------------------------------------------------------------------|
| Albania                     | 2005 | Living Standard Measurement Survey                                         |
| Cambodia                    | 2009 | Cambodia Social-Economic Survey                                            |
| Ethiopia                    | 2014 | Ethiopia Socioeconomic Survey                                              |
| India                       | 2012 | India Human Development survey                                             |
| Malawi                      | 2011 | Integrated Household Survey                                                |
| Mali                        | 2014 | Enquête Agricole de conjoncture integree aux Conditions de Vie des Menages |
| Niger                       | 2011 | National Survey on Household Living Conditions and Agriculture             |
| Nigeria                     | 2013 | General Household Survey                                                   |
| Timor-Leste                 | 2008 | Survey of Living Standards                                                 |
| United Republic of Tanzania | 2009 | National Panel Survey                                                      |
| Uganda                      | 2010 | The Uganda National Panel Survey                                           |



**Table S5. Pearson correlation coefficient between the harvested area of oil palm estimated by satellite images from Descals et al. (2020) and i) GAEZv4 crop map based farm-size- and crop-specific dataset and ii) SPAM2010 crop map based farm-size- and crop-specific dataset, respectively, for small farms (<10 ha) and large farms ( $\geq 10$  ha). Different from Table 2 in the manuscript, the threshold in this table is 10 ha. \*  $p < 0.005$ . \*\*  $p < 0.001$ .**

|                             |                | Small farms |           |           | Large farms |           |           |
|-----------------------------|----------------|-------------|-----------|-----------|-------------|-----------|-----------|
|                             |                | 5 arcmin    | 15 arcmin | 25 arcmin | 5 arcmin    | 15 arcmin | 25 arcmin |
| Colombia                    | GAEZv4 based   | 0.160**     | 0.290**   | 0.372**   | 0.112**     | 0.235**   | 0.335**   |
|                             | SPAM2010 based | 0.194**     | 0.460**   | 0.580**   | 0.383**     | 0.624**   | 0.704**   |
| Costa Rica                  | GAEZv4 based   | 0.187**     | 0.493**   | 0.574**   | -0.012      | -0.073    | -0.141**  |
|                             | SPAM2010 based | 0.310**     | 0.858**   | 0.935**   | 0.730**     | 0.888**   | 0.932**   |
| Brazil                      | GAEZv4 based   | 0.194**     | 0.313**   | 0.367**   | 0.193**     | 0.279**   | 0.305**   |
|                             | SPAM2010 based | 0.063       | 0.120**   | 0.180**   | 0.138**     | 0.141**   | 0.135**   |
| United republic of Tanzania | GAEZv4 based   | 0.011       | -0.107*   | -0.199**  | -0.012      | -0.040    | -0.065    |
|                             | SPAM2010 based | 0.008       | -0.005    | 0.027     | 0.058       | 0.145**   | 0.293**   |
| Peru                        | GAEZv4 based   | 0.112**     | 0.309**   | 0.422**   | 0.028       | 0.118**   | 0.213**   |
|                             | SPAM2010 based | 0.307**     | 0.285**   | 0.329**   | 0.109*      | 0.213**   | 0.231**   |

**Table S6. Pearson correlation coefficient between the harvested area of oil palm estimated by satellite images from Descals et al. (2020) and i) GAEZv4 crop map based farm-size- and crop-specific dataset and ii) SPAM2010 crop map based farm-size- and crop-specific dataset, respectively, for small farms (<50 ha) and large farms ( $\geq$ 50 ha). Different from Table 2 in the manuscript, the threshold in this table is 50 ha. \*  $p<0.005$ . \*\*  $p<0.001$ .**

|                             |                | Small farms |           |           | Large farms |           |           |
|-----------------------------|----------------|-------------|-----------|-----------|-------------|-----------|-----------|
|                             |                | 5 arcmin    | 15 arcmin | 25 arcmin | 5 arcmin    | 15 arcmin | 25 arcmin |
| Colombia                    | GAEZv4 based   | 0.209**     | 0.368**   | 0.468**   | 0.106**     | 0.232**   | 0.322**   |
|                             | SPAM2010 based | 0.225**     | 0.588**   | 0.748**   | 0.388**     | 0.618**   | 0.695**   |
| Costa Rica                  | GAEZv4 based   | 0.127*      | 0.248**   | 0.314**   | -0.073      | -0.176**  | -0.254**  |
|                             | SPAM2010 based | 0.784**     | 0.891**   | 0.927**   | 0.780**     | 0.903**   | 0.940**   |
| Brazil                      | GAEZv4 based   | 0.254**     | 0.436**   | 0.500**   | 0.080**     | 0.106**   | 0.116**   |
|                             | SPAM2010 based | 0.146**     | 0.230**   | 0.295**   | 0.033       | 0.023     | 0.013     |
| United republic of Tanzania | GAEZv4 based   | 0.010       | -0.110*   | -0.204**  | -0.011      | -0.037    | -0.061    |
|                             | SPAM2010 based | 0.024       | 0.025     | 0.069     |             |           |           |
| Peru                        | GAEZv4 based   | 0.213**     | 0.403**   | 0.491**   | 0.045       | 0.152**   | 0.256**   |
|                             | SPAM2010 based | 0.402**     | 0.414**   | 0.441**   | 0.182**     | 0.245**   | 0.297**   |

**Table S7. Percentage farm-size-specific irrigated area, for eleven countries for which household surveys were available (see S4). For each country with household survey, we calculated the percentage of total irrigated area (irrigated area divided by cultivated area) for each farm size (classified by crop area) where at least five survey samples are available. For each country with our dataset, we divided the harvested area under irrigated farming system used the total harvested area for each farm size.**

| Country  | Farm size      | 0 - 1 | 1 - 2 | 2 - 5 | 5 - 10 | 10 - 20 | 20 - 50 | 50 - 100 | 100 - 200 | 200 - 500 | 500 - 1000 | > 1000 |
|----------|----------------|-------|-------|-------|--------|---------|---------|----------|-----------|-----------|------------|--------|
| Albania  | Survey         | 55.2% | 36.4% | 25.5% |        |         |         |          |           |           |            |        |
|          | SPAM2010 based | 26.2% | 30.4% | 26.8% | 33.2%  | 38.2%   | 3.9%    | 55.8%    |           |           |            |        |
|          | GAEZv4 based   | 47.3% | 46.2% | 47.8% | 44.8%  | 43.8%   | 47.4%   | 88.9%    |           |           |            |        |
| Cambodia | Survey         | 49.1% | 43.6% | 42.7% | 29.0%  |         |         |          |           |           |            |        |
|          | SPAM2010 based | 24.2% | 19.4% | 18.3% | 21.3%  | 21.5%   | 14.0%   | 21.5%    | 11.1%     | 10.5%     |            |        |
|          | GAEZv4 based   | 31.2% | 19.5% | 16.1% | 13.3%  | 8.4%    | 17.1%   | 5.5%     | 10.7%     | 4.5%      |            |        |
| Ethiopia | Survey         | 5.1%  | 3.1%  | 2.4%  | 2.9%   |         |         |          |           |           |            |        |
|          | SPAM2010 based | 1.5%  | 1.1%  | 1.0%  | 1.1%   | 6.5%    | 4.3%    | 6.9%     | 0.9%      | 3.6%      | 1.9%       | 3.1%   |
|          | GAEZv4 based   | 3.0%  | 2.2%  | 1.8%  | 1.4%   | 5.5%    | 9.9%    | 40.9%    | 8.5%      | 2.9%      | 2.5%       | 3.2%   |
| India    | Survey         | 62.5% | 64.5% | 70.7% | 76.8%  | 74.1%   | 55.9%   |          |           |           |            |        |
|          | SPAM2010 based | 41.3% | 33.0% | 31.8% | 30.5%  | 30.8%   | 26.7%   | 26.7%    | 21.3%     | 17.3%     | 33.1%      | 31.1%  |
|          | GAEZv4 based   | 48.3% | 41.7% | 42.7% | 44.1%  | 46.3%   | 42.8%   | 45.3%    | 33.5%     | 45.0%     | 52.0%      | 18.5%  |
| Malawi   | Survey         | 1.8%  | 2.6%  | 2.6%  |        |         |         |          |           |           |            |        |
|          | SPAM2010 based | 0.5%  | 0.9%  | 0.1%  |        |         | 0.1%    |          |           |           |            |        |
|          | GAEZv4 based   | 1.8%  | 2.8%  | 3.2%  |        |         |         |          |           |           |            |        |
| Mali     | Survey         | 39.0% | 26.6% | 12.3% | 7.3%   | 4.7%    | 1.7%    |          |           |           |            |        |
|          | SPAM2010 based | 27.4% | 25.8% | 19.7% | 9.6%   | 14.2%   | 4.9%    | 9.5%     | 4.1%      | 2.2%      | 31.6%      | 5.5%   |
|          | GAEZv4 based   | 56.1% | 33.9% | 15.9% | 8.0%   | 9.1%    | 3.9%    | 7.0%     | 5.8%      | 2.2%      | 15.3%      | 53.1%  |
| Niger    | Survey         | 19.4% | 10.5% | 3.8%  | 2.0%   | 1.6%    | 0.1%    |          |           |           |            |        |
|          | SPAM2010 based | 0.0%  | 0.1%  | 0.0%  |        |         | 0.0%    |          |           |           |            |        |

|                             |  |                |       |       |       |      |       |      |        |      |       |      |      |
|-----------------------------|--|----------------|-------|-------|-------|------|-------|------|--------|------|-------|------|------|
| Nigeria                     |  | GAEZv4 based   | 2.4%  | 0.8%  | 1.5%  | 4.9% | 4.7%  | 0.6% | 0.7%   | 1.7% | 15.8% |      |      |
|                             |  | Survey         | 1.8%  | 1.8%  | 0.6%  | 0.0% |       |      |        |      |       |      |      |
|                             |  | SPAM2010 based | 1.8%  | 0.9%  | 0.8%  | 0.5% | 2.5%  | 1.8% | 0.1%   | 0.6% | 0.6%  | 0.9% | 0.4% |
| Timor-Leste                 |  | GAEZv4 based   | 0.5%  | 0.4%  | 0.4%  | 0.2% | 0.4%  | 0.3% | 0.4%   | 0.1% | 0.1%  |      | 0.2% |
|                             |  | Survey         | 12.5% | 8.3%  | 7.1%  |      |       |      |        |      |       |      |      |
|                             |  | SPAM2010 based | 22.7% | 11.0% | 14.9% | 2.7% | 18.6% |      | 64.7%  |      |       |      |      |
| United Republic of Tanzania |  | GAEZv4 based   | 20.6% | 9.1%  | 20.3% | 0.8% | 6.7%  |      | 100.0% |      |       |      |      |
|                             |  | Survey         | 4.0%  | 2.9%  | 3.0%  | 2.8% | 1.0%  |      |        |      |       |      |      |
|                             |  | SPAM2010 based | 1.8%  | 1.2%  | 1.0%  | 1.1% | 1.0%  | 1.7% | 1.5%   | 1.3% | 1.8%  | 2.5% | 1.5% |
| Uganda                      |  | GAEZv4 based   | 5.2%  | 2.4%  | 1.5%  | 1.6% | 1.2%  | 0.8% | 0.7%   | 0.9% | 1.6%  | 0.8% | 0.0% |
|                             |  | Survey         | 0.6%  | 1.0%  | 0.9%  | 0.0% |       |      |        |      |       |      |      |
|                             |  | SPAM2010 based | 1.0%  | 0.7%  | 4.8%  | 1.7% | 1.0%  |      |        |      |       |      |      |
|                             |  | GAEZv4 based   | 0.0%  | 0.2%  | 0.6%  | 1.0% | 0.0%  |      |        |      |       |      |      |

**Table S8. Number and percentage of grid cells that have similar, larger, and smaller dominant farm size in our datasets compared to earlier estimates by Mehrabi et al. (2020). Similar means the farm size in our datasets is the same or next to the farm size in the dataset by Mehrabi et al. (2020).**

| Country                | Number of pixels |        |         |              |        |         | Percentage of Pixels |        |         |              |        |         |
|------------------------|------------------|--------|---------|--------------|--------|---------|----------------------|--------|---------|--------------|--------|---------|
|                        | SPAM2010 based   |        |         | GAEZv4 based |        |         | SPAM2010 based       |        |         | GAEZv4 based |        |         |
|                        | similar          | larger | smaller | similar      | larger | smaller | similar              | larger | smaller | similar      | larger | smaller |
| Albania                | 339              | 47     | 84      | 352          | 39     | 37      | 72.1%                | 10.0%  | 17.9%   | 82.2%        | 9.1%   | 8.6%    |
| Austria                | 390              | 244    | 170     | 343          | 233    | 221     | 48.5%                | 30.3%  | 21.1%   | 43.0%        | 29.2%  | 27.7%   |
| Belgium                | 404              | 99     | 88      | 386          | 103    | 56      | 68.4%                | 16.8%  | 14.9%   | 70.8%        | 18.9%  | 10.3%   |
| Burkina Faso           | 820              | 2001   | 66      | 662          | 2277   | 49      | 28.4%                | 69.3%  | 2.3%    | 22.2%        | 76.2%  | 1.6%    |
| Bulgaria               | 1288             | 358    | 35      | 1249         | 341    | 24      | 76.6%                | 21.3%  | 2.1%    | 77.4%        | 21.1%  | 1.5%    |
| Bosnia and Herzegovina | 302              | 423    | 16      | 203          | 589    | 8       | 40.8%                | 57.1%  | 2.2%    | 25.4%        | 73.6%  | 1.0%    |
| Brazil                 | 18218            | 3912   | 21303   | 21956        | 6891   | 20596   | 41.9%                | 9.0%   | 49.0%   | 44.4%        | 13.9%  | 41.7%   |
| Colombia               | 998              | 408    | 3276    | 1145         | 468    | 3715    | 21.3%                | 8.7%   | 70.0%   | 21.5%        | 8.8%   | 69.7%   |
| Costa Rica             | 46               | 363    | 14      | 30           | 396    | 1       | 10.9%                | 85.8%  | 3.3%    | 7.0%         | 92.7%  | 0.2%    |
| Cyprus                 | 19               | 86     | 0       | 27           | 78     | 0       | 18.1%                | 81.9%  | 0.0%    | 25.7%        | 74.3%  | 0.0%    |
| Czechia                | 878              | 289    | 74      | 964          | 310    | 106     | 70.7%                | 23.3%  | 6.0%    | 69.9%        | 22.5%  | 7.7%    |
| Germany                | 2769             | 1810   | 1574    | 2784         | 2085   | 1462    | 45.0%                | 29.4%  | 25.6%   | 44.0%        | 32.9%  | 23.1%   |
| Denmark                | 704              | 128    | 20      | 647          | 109    | 23      | 82.6%                | 15.0%  | 2.3%    | 83.1%        | 14.0%  | 3.0%    |
| Spain                  | 917              | 5837   | 96      | 752          | 6014   | 88      | 13.4%                | 85.2%  | 1.4%    | 11.0%        | 87.7%  | 1.3%    |
| Estonia                | 474              | 369    | 3       | 468          | 365    | 38      | 56.0%                | 43.6%  | 0.4%    | 53.7%        | 41.9%  | 4.4%    |
| Ethiopia               | 4172             | 477    | 885     | 3647         | 494    | 740     | 75.4%                | 8.6%   | 16.0%   | 74.7%        | 10.1%  | 15.2%   |
| Finland                | 137              | 1593   | 11      | 188          | 1608   | 5       | 7.9%                 | 91.5%  | 0.6%    | 10.4%        | 89.3%  | 0.3%    |
| France                 | 6506             | 984    | 357     | 6850         | 1127   | 130     | 82.9%                | 12.5%  | 4.5%    | 84.5%        | 13.9%  | 1.6%    |
| United Kingdom         | 2475             | 182    | 202     | 3070         | 236    | 158     | 86.6%                | 6.4%   | 7.1%    | 88.6%        | 6.8%   | 4.6%    |
| Ghana                  | 477              | 1809   | 0       | 540          | 2112   | 1       | 20.9%                | 79.1%  | 0.0%    | 20.4%        | 79.6%  | 0.0%    |
| Greece                 | 866              | 491    | 307     | 862          | 552    | 255     | 52.0%                | 29.5%  | 18.4%   | 51.6%        | 33.1%  | 15.3%   |
| Croatia                | 256              | 464    | 62      | 249          | 495    | 58      | 32.7%                | 59.3%  | 7.9%    | 31.0%        | 61.7%  | 7.2%    |
| Hungary                | 719              | 535    | 23      | 754          | 639    | 46      | 56.3%                | 41.9%  | 1.8%    | 52.4%        | 44.4%  | 3.2%    |
| India                  | 23358            | 8820   | 4237    | 23511        | 8250   | 4359    | 64.1%                | 24.2%  | 11.6%   | 65.1%        | 22.8%  | 12.1%   |
| Ireland                | 713              | 212    | 139     | 777          | 231    | 135     | 67.0%                | 19.9%  | 13.1%   | 68.0%        | 20.2%  | 11.8%   |

|                             |       |       |       |       |       |      |       |       |       |       |       |       |
|-----------------------------|-------|-------|-------|-------|-------|------|-------|-------|-------|-------|-------|-------|
| Italy                       | 1641  | 1236  | 1051  | 1684  | 1472  | 913  | 41.8% | 31.5% | 26.8% | 41.4% | 36.2% | 22.4% |
| Cambodia                    | 362   | 1103  | 3     | 603   | 1245  | 30   | 24.7% | 75.1% | 0.2%  | 32.1% | 66.3% | 1.6%  |
| Lithuania                   | 379   | 746   | 178   | 373   | 602   | 313  | 29.1% | 57.3% | 13.7% | 29.0% | 46.7% | 24.3% |
| Luxembourg                  | 25    | 1     | 0     | 46    | 1     | 0    | 96.2% | 3.8%  | 0.0%  | 97.9% | 2.1%  | 0.0%  |
| Latvia                      | 518   | 498   | 158   | 581   | 401   | 302  | 44.1% | 42.4% | 13.5% | 45.2% | 31.2% | 23.5% |
| Mexico                      | 7899  | 3055  | 2822  | 8526  | 3115  | 2783 | 57.3% | 22.2% | 20.5% | 59.1% | 21.6% | 19.3% |
| Mali                        | 296   | 3698  | 0     | 225   | 4274  | 4    | 7.4%  | 92.6% | 0.0%  | 5.0%  | 94.9% | 0.1%  |
| Mongolia                    | 83    | 18    | 65    | 556   | 466   | 425  | 50.0% | 10.8% | 39.2% | 38.4% | 32.2% | 29.4% |
| Malawi                      | 732   | 104   | 0     | 799   | 167   | 0    | 87.6% | 12.4% | 0.0%  | 82.7% | 17.3% | 0.0%  |
| Niger                       | 1843  | 1424  | 107   | 2050  | 1385  | 113  | 54.6% | 42.2% | 3.2%  | 57.8% | 39.0% | 3.2%  |
| Nigeria                     | 6164  | 3759  | 1     | 6580  | 3812  | 2    | 62.1% | 37.9% | 0.0%  | 63.3% | 36.7% | 0.0%  |
| Netherlands                 | 340   | 161   | 79    | 375   | 165   | 82   | 58.6% | 27.8% | 13.6% | 60.3% | 26.5% | 13.2% |
| Norway                      | 99    | 243   | 33    | 131   | 293   | 14   | 26.4% | 64.8% | 8.8%  | 29.9% | 66.9% | 3.2%  |
| Panama                      | 192   | 111   | 153   | 207   | 116   | 218  | 42.1% | 24.3% | 33.6% | 38.3% | 21.4% | 40.3% |
| Peru                        | 691   | 294   | 2533  | 1127  | 483   | 3721 | 19.6% | 8.4%  | 72.0% | 21.1% | 9.1%  | 69.8% |
| Poland                      | 2728  | 1709  | 1244  | 2697  | 1754  | 1352 | 48.0% | 30.1% | 21.9% | 46.5% | 30.2% | 23.3% |
| Portugal                    | 623   | 332   | 171   | 626   | 474   | 94   | 55.3% | 29.5% | 15.2% | 52.4% | 39.7% | 7.9%  |
| Paraguay                    | 932   | 83    | 766   | 1289  | 107   | 838  | 52.3% | 4.7%  | 43.0% | 57.7% | 4.8%  | 37.5% |
| Romania                     | 1640  | 1207  | 515   | 1674  | 1234  | 565  | 48.8% | 35.9% | 15.3% | 48.2% | 35.5% | 16.3% |
| Russian Federation          | 28678 | 12171 | 9310  | 38082 | 15146 | 9041 | 57.2% | 24.3% | 18.6% | 61.2% | 24.3% | 14.5% |
| Slovakia                    | 494   | 141   | 1     | 551   | 173   | 6    | 77.7% | 22.2% | 0.2%  | 75.5% | 23.7% | 0.8%  |
| Slovenia                    | 21    | 142   | 0     | 34    | 211   | 0    | 12.9% | 87.1% | 0.0%  | 13.9% | 86.1% | 0.0%  |
| Sweden                      | 655   | 1148  | 15    | 617   | 1128  | 54   | 36.0% | 63.1% | 0.8%  | 34.3% | 62.7% | 3.0%  |
| Tajikistan                  | 170   | 650   | 20    | 215   | 705   | 14   | 20.2% | 77.4% | 2.4%  | 23.0% | 75.5% | 1.5%  |
| Timor-Leste                 | 144   | 4     | 0     | 159   | 5     | 1    | 97.3% | 2.7%  | 0.0%  | 96.4% | 3.0%  | 0.6%  |
| United Republic of Tanzania | 1679  | 3706  | 5     | 2328  | 5416  | 5    | 31.2% | 68.8% | 0.1%  | 30.0% | 69.9% | 0.1%  |
| Uganda                      | 1047  | 109   | 946   | 1072  | 86    | 1074 | 49.8% | 5.2%  | 45.0% | 48.0% | 3.9%  | 48.1% |
| Uruguay                     | 1124  | 250   | 295   | 1521  | 339   | 139  | 67.3% | 15.0% | 17.7% | 76.1% | 17.0% | 7.0%  |
| United States of America    | 46349 | 17045 | 10691 | 51825 | 20422 | 6516 | 62.6% | 23.0% | 14.4% | 65.8% | 25.9% | 8.3%  |
| South Africa                | 1044  | 78    | 6869  | 870   | 60    | 6459 | 13.1% | 1.0%  | 86.0% | 11.8% | 0.8%  | 87.4% |

|       |        |       |       |        |        |       |       |       |       |       |       |       |
|-------|--------|-------|-------|--------|--------|-------|-------|-------|-------|-------|-------|-------|
| Total | 176837 | 87167 | 71073 | 199839 | 101299 | 67389 | 52.8% | 26.0% | 21.2% | 54.2% | 27.5% | 18.3% |
|-------|--------|-------|-------|--------|--------|-------|-------|-------|-------|-------|-------|-------|

## Reference

- Descals, A., Wich, S., Meijaard, E., Gaveau, D., Peedell, S., and Szantoi, Z.: High-resolution global map of smallholder and industrial closed-canopy oil palm plantations, Earth System Science Data, 2020.
- FAO: RuLIS - Rural Livelihoods Information System, FAO UN, Rome, Italy, 2021.
- FAO: FAOSTAT, FAO UN, Rome, Italy, 2022.
- Fischer, G., Nachtergaele, F. O., van Velthuisen, H., Chiozza, F., Francheschini, G., Henry, M., Muchoney, D., and Tramberend, S.: Global Agro-ecological Zones (GAEZ v4)-Model Documentation, FAO Rome, Italy, 2021.
- Lowder, S. K., Scoet, J., and Raney, T.: The Number, Size, and Distribution of Farms, Smallholder Farms, and Family Farms Worldwide, World Development, 87, 16-29, 10.1016/j.worlddev.2015.10.041, 2016.
- Mehrabi, Z., McDowell, M. J., Ricciardi, V., Levers, C., Martinez, J. D., Mehrabi, N., Wittman, H., Ramankutty, N., and Jarvis, A.: The global divide in data-driven farming, Nature Sustainability, 4, 154-160, 10.1038/s41893-020-00631-0, 2020.
- Yu, Q., You, L., Wood-Sichra, U., Ru, Y., Joglekar, A. K. B., Fritz, S., Xiong, W., Lu, M., Wu, W., and Yang, P.: A cultivated planet in 2010 – Part 2: The global gridded agricultural-production maps, Earth System Science Data, 12, 3545-3572, 10.5194/essd-12-3545-2020, 2020.
